# Supplementary material for: Grape juice attenuates left ventricular hypertrophy in dyslipidemic mice
Source: PubMed Central journal article supplement (PMC7470265; doi:10.1371/journal.pone.0238163), 2020-09-03
Supplement: pone.0238163.s001.pdf [file pone.0238163.s001.pdf]

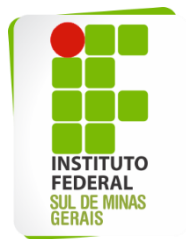

## **COMITÊ DE ÉTICA NO USO DE ANIMAIS – CEUA/IFSULDEMINAS**

### **Parecer N°: 03/A 2014.**

A Comissão de Ética no Uso de Animais (CEUA), do Instituto Federal do Sul de Minas Gerais, após analisar o projeto de pesquisa intitulado: Influência de fitoterápicos e alimentos funcionais na dislipidemia, na hipertrofia ventricular esquerda e na aterosclerose de camundongos dislipidêmicos, do pesquisador Professor Dr. José Antonio Dias Garcia, decidiu enquadrá-lo na categoria de **APROVADO**.

Machado, 30 de Setembro de 2014.

**Professor Dr. José Antônio Dias Garcia  
Coordenador do CEUA – IFSULDEMINAS**

**Apresentação de relatório Final – 30/09/2016**

**Modelo de relatório = NIPE.**
